# Supplementary material for: Direct Retino-Raphe Projection Alters Serotonergic Tone and Affective Behavior
Source: PubMed Central journal article supplement — Neuropsychopharmacology. 2013 Feb 27;38(7):1163–75. doi: 10.1038/npp.2013.35 (PMC3656380; doi:10.1038/npp.2013.35), 2013-02-27
Supplement: npp201335x1.pdf [file npp201335x1.pdf]

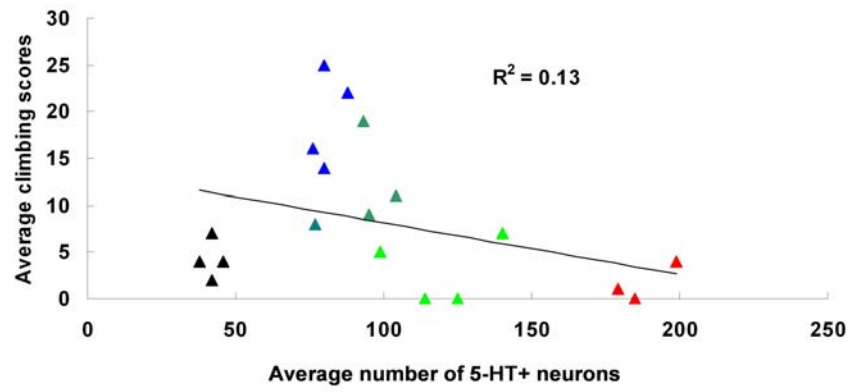

**Supplementary Figure 1: Relationship between FST climbing scores and DRN 5-HT+ neurons in experimental groups.** Climbing behavior is not correlated with the number of neurons expressing detectable levels of 5-HT in the DRN. LD (▲), DD (▲), MNU-DD (▲), MNU-DD-TTX (▲) and MNU-DD-SAP (▲).

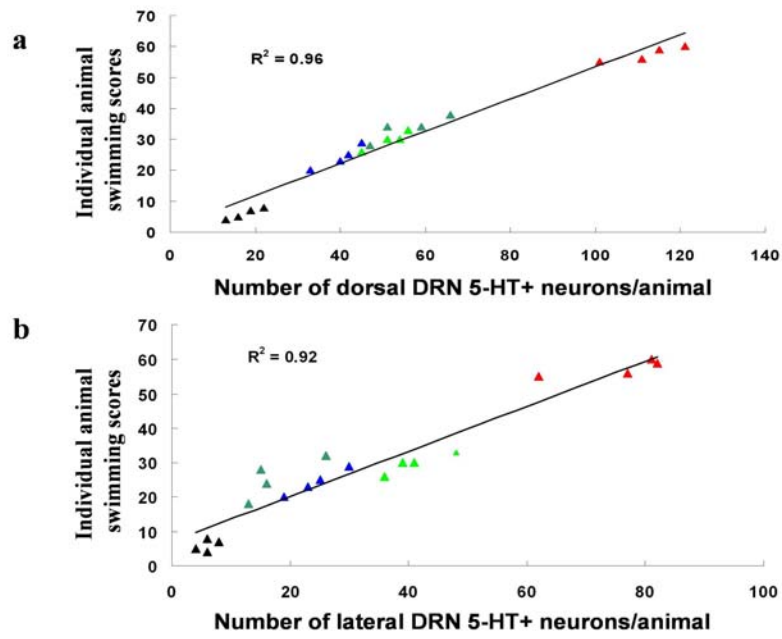

**Supplementary Figure 2: Relationship between FST swimming scores and DRN 5-HT+ neurons in experimental groups.** Swimming behavior is positively correlated with the number of neurons expressing detectable levels of 5-HT in the dorsal (a) and lateral (b) regions of the DRN. LD ( $\blacktriangle$ ), DD ( $\blacktriangle$ ), MNU-DD ( $\blacktriangle$ ), MNU-DD-TTX ( $\blacktriangle$ ) and MNU-DD-SAP ( $\blacktriangle$ ).

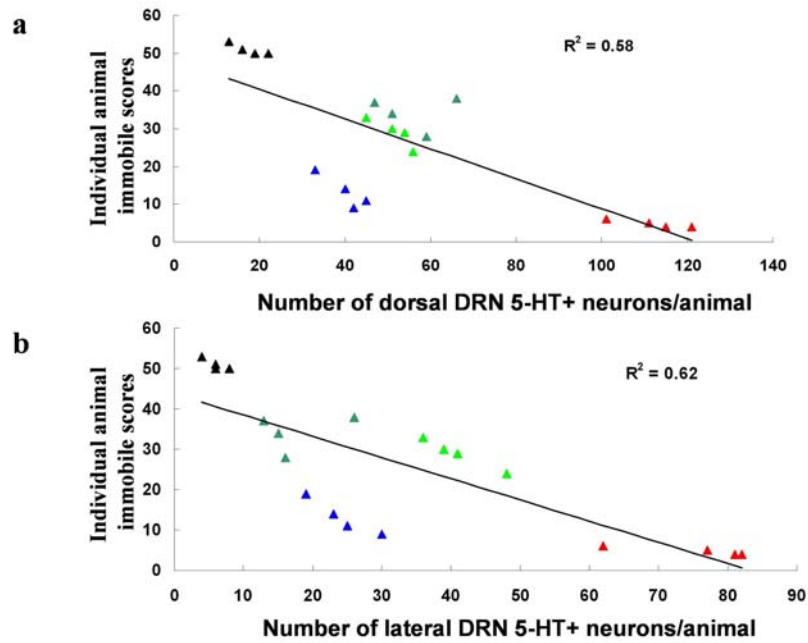

**Supplementary Figure 3: Relationship between individual animal immobile scores in FST and DRN 5-HT+ neurons.** Immobile behavior is negatively correlated with the number of neurons expressing detectable levels of 5-HT in the dorsal (a) and lateral (b) regions of the DRN. LD ( $\blacktriangle$ ), DD ( $\blacktriangle$ ), MNU-DD ( $\blacktriangle$ ), MNU-DD-TTX ( $\blacktriangle$ ) and MNU-DD-SAP ( $\blacktriangle$ ).

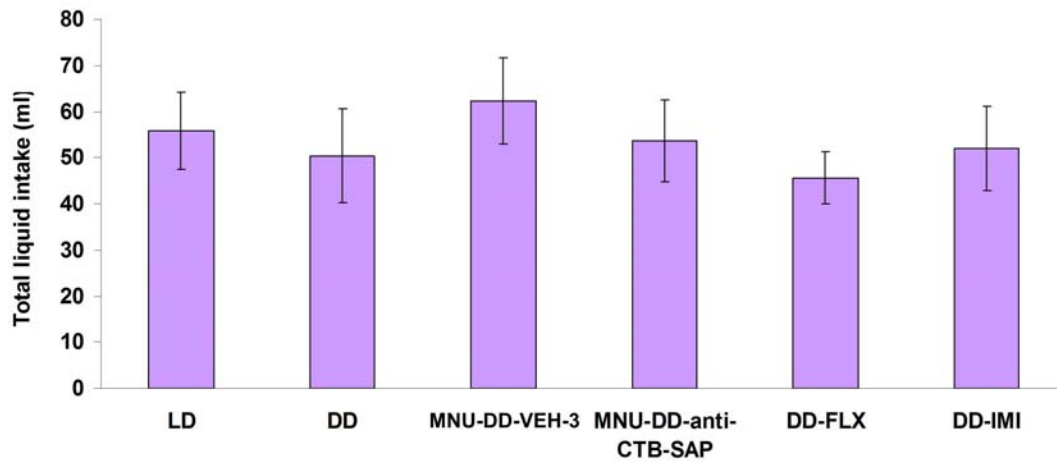

**Supplementary Figure 4: Total liquid intake of different groups in SPT.** Total liquid intake (water plus sucrose solution) during 48 hour SPT was unchanged between each experimental groups (LD, DD, MNU-DD-VEH-3, MNU-DD-anti-CTB-SAP, DD-FLX, DD-IMI) ( $F_{5,30}=0.58$ ,  $p=0.72$ ). Results are presented as mean of total liquid intake  $\pm$  SEM.

| Number of DRN-projecting alpha cells needed to tile up the retinal surface: |                    |
|-----------------------------------------------------------------------------|--------------------|
| Average dendritic field diameter (mm)                                       | <b>0.335±0.134</b> |
| Number of alpha cells                                                       | <b>57</b>          |
| Retinal area (mm <sup>2</sup> ) (5)                                         | <b>64</b>          |
| Average RF radius (mm)                                                      | <b>0.168±0.067</b> |
| Average RF area mm <sup>2</sup>                                             | <b>0.089</b>       |
| <b>Number of cells needed to cover the entire retinal surface</b>           | <b>719</b>         |

**Supplementary Table 1: Number of DRN-projecting alpha RGCs needed to tile the retinal surface.** Calculations used to determine the number of alpha RGCs needed to tile the retinal surface. Values in red from Berton and Nestler (2006); retinal surface area from Fite *et al.*, (1999); approximately 700 DRN-projecting alpha RGCs tile the retinal surface, a criterion to be considered a type of RGC (Luan *et al.*, 2011).

**Movie S1-5.**

1. Animals kept in normal 12L/12D condition for 14 days (LD).
2. Animals were light deprived for 14 days (DD).
3. Animals received MNU treatment and kept in DD for 14 days (MNU-DD).
4. MUN treated animals and DRN-projecting RGCs were eliminated (MNU-DD-anti-CTB-SAP).
5. Animals kept in DD and received FLX chronic treatment before FST (DD-FLX).
6. Animals kept in DD and received IMI chronic treatment before FST (DD-IMI).

**References:**

- Berton O, Nestler EJ (2006) New approaches to antidepressant drug discovery: beyond monoamines. *Nat. Rev. Neurosci* 7:137-51.
- Fite KV, Janusonis S, Foote W, Bengston L (1999) Retinal afferents to the dorsal raphe nucleus in rats and Mongolian gerbils. *J. Comp. Neurol* 414:469-84.
- Luan L, et al. (2011) Y-like retinal ganglion cells innervate the dorsal raphe nucleus in the Mongolian gerbil (*Meriones unguiculatus*). *PLoS One* 6:e18938.
